1 **Modelling liver cancer microenvironment: novel 3D culture system as**  
2 **a potential anti-cancer drug screening tool**

3  
4 Ala'a Al Hrou<sup>1,2</sup>, Karla Cervantes-Gracia<sup>1</sup>, Richard Chahwan<sup>1\*</sup>, Amr Amin<sup>2,3\*</sup>

5  
6 <sup>1</sup> Institute of Experimental Immunology, University of Zurich, 8057 Zurich, Switzerland

7 <sup>2</sup> Biology Department, College of Science, UAE University, P.O. Box 15551, Al-Ain, UAE

8 <sup>3</sup> The University of Chicago, Chicago, IL 60637, USA

9  
10 **\* Equal contributing authors and to whom correspondence should be addressed:**

11 Prof Amr Amin

12 Biology Department, UAE University, Al Ain P.O.Box: 15551, UAE.

13 Tel: +971 3 7136519

14 Fax: +971 3 6761291

15 Email: [a.amin@uaeu.ac.ae](mailto:a.amin@uaeu.ac.ae)

16 Or

17 Prof Dr Richard Chahwan

18 Institute of Experimental Immunology, University of Zurich, Winterthurerstrasse 190, Y23K74,

19 Zurich 8057, Switzerland

20 Tel: +41 446353710

21 Fax: +41 446356883

22 Email: [chahwan@immunology.uzh.ch](mailto:chahwan@immunology.uzh.ch)

23  
24 **Running title:** 3D multicellular organoid system mimics the tumor milieu

25  
26 **Keywords:** 3D co-culture, transcriptomic, proteomics, systems biology, ex vivo cancer  
27 modelling.

28  
29 **Word count:** ~5,349

30 **ABSTRACT**

31 The tumor microenvironment and its contribution to tumorigenesis has been a focal highlight in  
32 recent years. A two-way communication between the tumor and the surrounding  
33 microenvironment sustains and contributes to the growth and metastasis of tumors.  
34 Progression and metastasis of hepatocellular carcinoma have been reported to be exceedingly  
35 influenced by diverse microenvironmental cues. In this study, we present a 3D-culture model of  
36 liver cancer to better mimic *in vivo* tumor settings. By creating novel 3D co-culture model that  
37 combines free-floating and scaffold based 3D-culture techniques of liver cancer cells and  
38 fibroblasts, we aimed to establish a simple albeit reproducible *ex vivo* cancer microenvironment  
39 model that captures tumor-stroma interactions. The model presented herein exhibited unique  
40 gene expression and protein expression profiles when compared to 2D and 3D mono-cultures  
41 of liver cancer cells. Our results showed that *in vivo* like conditions cannot be mimicked by  
42 simply growing cancer cells as spheroids, but by co-culturing them with 3D fibroblast with  
43 which they were able to cross-talk. This was evident by the upregulation of several pathways  
44 involved in HCC, and the increase in secreted factors by co-cultured cancer cells, many of which  
45 are also involved in tumor-stroma interactions. Compared to the conventional 2D culture, the  
46 proposed model exhibits an increase in the expression of genes associated with development,  
47 progression, and poor prognosis of HCC. Our results correlated with an aggressive outcome that  
48 better mirrors *in vivo* HCC, and therefore, a more reliable platform for molecular understanding  
49 of HCC and possibly better anti-cancer drug screening.

## 50 INTRODUCTION

51 Cancer is a multi-factorial disease, arising from normal cells, primarily through abnormal  
52 cellular proliferation and progressive mutation load. Tumor cells, however, represent only one  
53 aspect of tumorigenesis. The tumor milieu is composed of a dynamic network of non-malignant  
54 cellular components, non-cellular components, signaling molecules, and extracellular matrix  
55 (ECM) [1,2], which collectively forms the tumor microenvironment (TME). A dynamic two-way  
56 communication between the tumor and the surrounding milieu, sustains and contributes to  
57 tumor growth and metastasis [3]; thereby highlighting the key role the TME plays in tumor  
58 progression [1,4]. In addition, many studies have reported the positive role of the TME in  
59 restraining tumor initiation and progression at initial stages of carcinogenesis [5], and how “re-  
60 programming” the TME in the later stages holds a great potential for developing effective  
61 cancer treatments [1].

62 Fibroblasts are generally considered the predominant cellular TME component. Whilst  
63 normally in an “inactive” quiescent state; fibroblasts recruited to the tumor site are constantly  
64 activated by the tumor through paracrine signaling, after which they are transformed into  
65 cancer-associated fibroblasts (CAFs) [6]. Once the CAF transition is triggered, paracrine signaling  
66 is no longer needed [7]. These transformed CAFs become distinct in their morphology and  
67 function from normal fibroblasts [7], most likely due to their rewiring by tumor signaling. CAFs  
68 possess higher ability to proliferate [8], be tumor proximal, and evade apoptosis [9]. But the  
69 molecular mechanisms mediating this process remains elusive. CAFs contribute significantly to  
70 tumorigenesis; partly through suppressing immune responses, secreting growth factors,  
71 cytokines, and proangiogenic factors [10]. In addition, CAFs contribute to tumorigenesis  
72 through secreting ECM proteins and degrading matrix metalloproteinase (MMPs), which  
73 together, give CAFs their ECM remodeling ability [10]. CAFs, therefore, have potential as  
74 therapeutic targets [11].

75 A tumor has an increasing demand for oxygen and nutrients to support its progression.  
76 When the demand for oxygen remains unmet, low oxygen hypoxic conditions ensue [12]. To  
77 survive, tumor cells activate the hypoxia-inducible factor 1 (HIF1) [12], which in turn activates  
78 the transcription of a group of genes through binding to their hypoxia-response elements to

79 promote the survival of tumor cells [13]. HIF-1 targeted genes significantly contribute to tumor  
80 angiogenesis, metastasis, adhesion, metabolism, and pH regulation [13]. Moreover, many  
81 studies have highlighted the role of hypoxia in recruiting stromal components to the TME [14],  
82 ECM composition, and metastatic remodeling [15]

83 Hepatocellular carcinoma (HCC), is the fifth most common cancer and is the fourth cause  
84 of cancer-related death worldwide [16]. HCC has a very poor prognosis with only five-year  
85 survival rate [17]. HCC progression is influenced by the liver microenvironment such as altered  
86 stromal cells [18]. These cells deposit ECM proteins causing fibrosis that then progresses to  
87 cirrhosis with a prevalence of 80-90% [18]; suggesting a crucial role of ECM build-up in HCC  
88 progression [19]. Hypoxia represents a driving force for HCC progression, and is associated with  
89 poor prognosis [20]. HIF-mediated gene expression contributes to different aspects of HCC  
90 metastasis, such as epithelial mesenchymal transition (EMT) [21], invasion of the ECM, and  
91 metastasis [22]. Yet the molecular mechanisms governing stromal and tumor cell interactions  
92 within the TME of HCC under hypoxic conditions [14] remains unclear.

93 To reflect the complexity and dynamic nature of tumor cell biology, a physiologically  
94 relevant model is needed. Especially, when it comes to drug discovery and identifying effective  
95 therapeutic targets. To simulate *in vivo* environment, *in vitro* two-dimensional (2D) cell culture  
96 is typically assembled by growing cells *commonly* on a plastic substrate in an adherent  
97 monolayer. However, distortion of spatial arrangement of cells in 2D culture changes cell-cell  
98 and cell-matrix interactions [23], and most importantly, alters the response of cells to certain  
99 drugs and treatments [24]. That is why, 3D cultured cells better recapitulates *in vivo*  
100 architecture of tumors and exhibits gene expression closer to that of *in vivo* tumors [23]. One  
101 very common 3D cultured cells model is the spheroid; a micro cell cluster sphere [25]. The  
102 nature of this three-dimensional multicellular model is what makes it an attractive tool to  
103 simulate solid tumors *in vitro* as it is composed of three regions, a highly proliferative outer  
104 region, a middle quiescent region, and a hypoxic core region [26]. Such compartmentalization  
105 creates diffusional gradients of oxygen, nutrients, and tested drugs among all three regions of  
106 the spheroid, which is also characteristic of solid tumors [27].

107 We aimed at modeling the basic TME of liver cancer by mimicking certain aspects of in vivo  
108 tumors, such as three-dimensionality of tissue, hypoxia, and heterogeneity of tumors. Five  
109 groups were designed to reflect each element, group 1 is a control group for comparison  
110 purposes which consists of 2D mono-cultures of liver cancer cells. Group 2 is also 2D mono-  
111 cultures of liver cancer cells but induced for hypoxia chemically. Group 3 on the other hand is  
112 like group 2 but additionally includes conditioned media from 2D fibroblasts to reflect a one-  
113 way co-culture system. Group 4 and 5 are 3D cultures of liver cancer cells that exhibit hypoxia  
114 physiologically due to culturing conditions. However, group 5, which is our proposed model,  
115 includes a 3D culture of fibroblast in a separate insert, reflecting a two-way co-culture system.  
116 Our findings reported herein demonstrate that our proposed model of group 5 reflects many  
117 aspects of in vivo settings and signaling pathways, promoting it as a potential platform for  
118 further studies of drug efficacy in vitro and understanding the communication between cancer  
119 and the stroma in liver cancer.

120

## 121 **MATERIALS AND METHODS**

### 122 ***Co-culture Systems***

123 For the 2D co-culture, a one-way communication system was followed. Briefly, HepG2 and SV-  
124 80 cells were seeded at a density of  $1 \times 10^6$  in conventional 2D culturing flasks in DMEM media.  
125 Flasks were incubated at 37°C in 5% CO<sub>2</sub> humidified incubator for about 24 hours. Conditioned  
126 media of SV-80 cell line was collected, centrifuged to collect any cellular debris, and applied to  
127 HepG2 cells, which were incubated with the conditioned media for 48 hours.

128 For the 3D co-culture, a two-way communication system was followed. Briefly, HepG2 and SV-  
129 80 3D cultures were prepared separately. Prior to co-culture, 6-well plates were coated with  
130 1.5% agarose, and allowed to set and cool before transferring HepG2 spheres to the bottom of  
131 the coated plates, and the inserts containing SV-80 3D culture were placed on top. HepG2 and  
132 SV-80 3D cultures were incubated for 48 hours.

133 The remaining materials and methods are included in supplementary data.

134

135

## 136 RESULTS

### 137 *Comparing 2D, mono- 3D, and co- 3D cultures and their gene expression*

138 Fibroblasts grown as a 2D culture exhibit an elongated morphology. However, growing  
139 fibroblasts as 3D culture in porous scaffolds alters their morphology to be more rounded.  
140 HepG2 cells grown in 3D were monitored over a period of 5 days to assess formation of tight  
141 spheroids with a smooth surface (Fig. 1A-B). HepG2 2D cultures were treated with increasing  
142 concentrations of CoCl<sub>2</sub> (100-400 μM) to assess cellular viability under hypoxia-mimicking  
143 conditions (Fig. 1C). Treatment of HepG2 with CoCl<sub>2</sub> did not affect cellular viability significantly  
144 at doses of 100 and 200 μM of CoCl<sub>2</sub>. However, a highly significant difference ( $p < 0.001$ ) was  
145 noted at a dose of 400 μM CoCl<sub>2</sub>. To confirm the induction of hypoxia in CoCl<sub>2</sub>- treated HepG2  
146 2D cultures, protein expression of HIF1α was assessed using western blot. Treatment with 200  
147 μM of CoCl<sub>2</sub> for 6 hours did not induce HIF1α expression. However, by increasing the dose to  
148 300 μM, HIF1α expression was detected in HepG2 cells (Fig. 1D). Immunofluorescence was then  
149 used to detect the cellular localization of HIF1α, showing that CoCl<sub>2</sub> also affects HIF1α  
150 translocation to the nucleus (Fig. 1E), where it can bind to hypoxia-response elements (HREs).

151

### 152 *Differential gene expression analysis*

153 To better assess in vivo mimicking capabilities of our 5 groups, RNA from the denoted samples  
154 (Fig. 1A) were extracted and then sequenced via the Illumina platform. Significant differentially  
155 expressed genes (DEGs) were determined at a cutoff of Log2FC of 1 and FDR < 0.05. A  
156 hierarchical clustering Heatmap was used to explore changes in global gene expression across  
157 our 5 models (Fig. 2 A). Interestingly, group 5 clustered separately from the rest, revealing a  
158 fundamental and distinctive change in gene expression. Principal component analysis (PCA)  
159 based on the global gene expression showed a similar outcome, where group 5 segregated at  
160 the opposite extreme of all other groups, with the conventional HepG2 culture (group 1) being  
161 the most distant (Fig. 2B), suggesting fundamental differences between 2D, monocellular 3D,  
162 and multicellular 3D models.

163 Significant differentially expressed genes (DEG) were determined relative to group 1 using RNA-  
164 seq 2G. Group2 resulted in significant upregulation of 243 genes and downregulation of 131

165 genes. Group3 increased the number of significantly DEGs to 474 upregulated and 145  
166 downregulated genes. When comparing gene expression profile of group 4 to group 1, 203  
167 genes were significantly upregulated, whereas 82 genes were downregulated. Group 5  
168 dramatically changed the gene expression of HepG2 by significantly upregulating 1291 and  
169 downregulating 880 genes in group 5 in comparison to group 1. PCA plot based on the DEGs  
170 showed similar results to the global expression PCA plot, whereby group 5 was segregating  
171 separately from the remaining groups (Fig. 2C). In Addition, significant DEGs signatures, unique  
172 to each group, were identified (Fig. 2D). Group 5 exhibited the highest number in unique  
173 significant DEGs among all other groups, at 957 upregulated genes and 796 downregulated  
174 genes. A full List of common and unique significantly DEGs of each group is available in  
175 supplementary files 1 and 2.

176 Canonical pathways associated with significant DEGs in different culturing conditions were  
177 analyzed using gene-based enrichment analysis by XGR. As expected, culturing HepG2 cells  
178 under hypoxia-mimicking conditions (group 2 and 3) upregulated genes involved in hypoxia-  
179 inducible factor-1 alpha (HIF1- $\alpha$ ) and hypoxia-inducible factor-2 alpha (HIF2- $\alpha$ ) pathways, and  
180 networks downstream of these pathways. This was even observed in 3D spheroid cultures  
181 (group 4 and 5) despite not being treated with a hypoxia inducing agent, indicating the  
182 formation of hypoxic core in 3D culture spheroids. Culturing HepG2 cells with only fibroblasts  
183 conditioned media (group 3) or alternatively with 3D culture of fibroblasts (group 5)  
184 upregulated genes involved in integrin family cell surface interactions, interleukin-6 (IL6)  
185 mediated signaling events (Table S1).

186

### 187 ***In-depth pathway functional analysis reveals pathways associated with HCC progression.***

188 To further understand the role of significant DEGs in each group, we applied clustering analysis  
189 using ClueGO/CluePedia as described previously [28] . By combining Gene Ontology (GO) terms,  
190 KEGG and Wiki pathways, ClueGo/CluePedia create a better interpretation of the pathways  
191 associated with the list of input genes [29] . Hypoxia mimicking conditions in group 2 induced  
192 cellular responses to hypoxia and HIF-1 signaling pathway, as well as other signaling pathways  
193 reported to promote HCC including NRF2, FOXO, and p53 pathways [30,31] (Fig. 3A-B).

194 Similarly, inducing hypoxia in group 3 resulted in inducing HIF-1 signaling pathways. However,  
195 with the addition of fibroblast conditioned media, group 3 DEGs-associated processes were  
196 enriched in 3 out of 5 pathways previously reported in KEGG analysis of HCC patients' tissues  
197 including i) complement and coagulation cascades, ii) focal adhesion, and iii) ECM-receptor  
198 interaction [32] (Fig. 3A). DEGs-associated processes of HepG2 3D culture alone (group 4)  
199 resembled some of group 2 such as hypoxia and NRF2 signaling pathways, but also some of  
200 group 3 such as G3 such as complement and coagulation cascades (Fig. 3A). Additionally, DEGs-  
201 associated processes of group 4 included steroid hormone biosynthesis process and estrogen  
202 signaling pathway, which have been linked to HCC progression [33] (Fig. 3A). Group 5 shared  
203 some pathways with the other groups such as hypoxia, focal adhesion, glycolysis/  
204 gluconeogenesis, and estrogen signaling pathway. In addition, DEGs-associated processes of  
205 group 5 were significantly enriched in HCC-promoting pathways including oncostatin M  
206 signaling pathway, insulin signaling pathway and aryl hydrocarbon receptor pathways [34,35]  
207 (Fig. 3B).

208 After identifying the main pathways involved in group 5 through ClueGO/CluePedia clustering,  
209 Insulin signaling pathway was further analyzed and visualized in PathVisio due to its  
210 documented relevance in HCC [36] and to gain insights of significant physiological changes  
211 occurring within a specific pathway. Genes below FDR 0.05 (5871 hits) were imported into  
212 PathVisio [37] to identify trends in regulation within this particular pathway and other chained  
213 events embedded within associated pathways. Inconsistencies within these maps were  
214 excluded from the final pathway (Fig. 4). The Insulin signaling pathway in group 5 was found to  
215 mainly lead to activation of genes involved MAPK signaling and this trend converges with  
216 hypoxia signaling input, both leading to the production of VEGFB, VEGFA, PGF, growth factors  
217 known to be involved in angiogenesis and tumor invasion [38]. Tumor invasion can also be  
218 promoted via Ras and its downstream pathways of MAPK and RALB, which were all shown to be  
219 upregulated in group 5. Some of the genes involved in the pathway shown previously have  
220 been validated with qPCR (Fig. 5A).

221

222 ***Co-culture of Fibroblasts and HepG2 3D cultures enriches the secretome in pro-tumor factors***



223 To identify signaling factors playing a role in the crosstalk between cancer cells and fibroblasts,  
224 the secretome of group 4 and 5 was analyzed for factors involved in angiogenesis, invasion, and  
225 metastasis, in addition to other factors in the insulin signaling pathway, secretome of 3D  
226 fibroblasts was included as a control (Fig S2, Fig. 5B-F). Most factors were dramatically  
227 increased in the secretome of group 5 (from both fibroblasts and HepG2 cells) when compared  
228 to 3D mono-cultures. Co-culturing HepG2 spheroids with 3D culture of fibroblasts increased the  
229 levels of insulin signaling pathway factors like IGF-II, IGFBP1, IGFBP2 (Fig 5B). In addition, levels  
230 of different angiogenesis and cytokines that are involved in the cross-talk in the TME were  
231 highly increased in the setting of group 5 (Fig 5C & F).

232 As the secretome collected from group 5 is shared among fibroblasts and HepG2 cells, we  
233 wanted to confirm the source of the secreted factors. To that end we compared gene  
234 expression of 3D HepG2 or 3D fibroblasts before and after co-culture (group 5 over group 4)  
235 (Fig. 5G). Differential gene expression analysis revealed that M-CSF, IGFBP1, IGFBP2, TGF- $\beta$ , and  
236 PECAM-1 were upregulated in HepG2 cells after co-culture, while they were not differentially  
237 expressed in fibroblasts. On the other hand, TGF- $\alpha$ , and IL-1 $\beta$  were only differentially expressed  
238 in fibroblasts after co-culture. VEGF and IGF-II were differentially expressed in both HepG2 cells  
239 and fibroblasts, being more upregulated in HepG2 cells (Fig. 5G). Despite that VEGF is  
240 upregulated more than 2.5 folds on the RNA level in HepG2 cells after co-culture (Fig. 5G), there  
241 was no noticeable difference in the secreted VEGF from 3D HepG2 cells before and after co-  
242 culture (Fig. 5F). Nonetheless, VEGFR2 was more expressed in group 5 in comparison to group 1  
243 and group 4; while VEGFR1 was higher in the 3D cultures, but no noticeable difference between  
244 the two (Fig. 5H). TNFR1 was also dramatically higher in group 5 when compared to both group  
245 1 and group 4 (Fig. 5H). Kaplan-Meier curves of genes within our main pathway of interest were  
246 analyzed. IGF1R and EGLN3 showed a significant correlation between expression and prognosis  
247 (Fig. 5 I-J). Both genes were shown to be involved in insulin signaling pathway (Fig. 4).

248

#### 249 ***Pathway complementation analysis highlights regulatory miRNAs and prognosis markers***

250 To better understand the changes elicited by the 3D co-culture conditions on HepG2 cells, we  
251 investigated the effect of miRNA regulation given their role in affecting *de novo* or modulating

252 established gene expression in tumors [39,40]. Based on miRNA-gene interaction analysis of  
253 significant DEGs in group 5, miR-335 was the top regulatory miRNA with the highest number of  
254 connections to other genes in the network (Fig. S4 A). Other miRNAs were predicted, top 10 are  
255 shown in Fig. S4 B with literature citations (full list is available in Table S2).

## 256 **DISCUSSION**

### 257 **Establishment of 3D culture models**

258 We investigated the bilateral effect of the cellular architecture and milieu on the properties and  
259 phenotypic responses of the whole cellular microenvironment of tumor cells. Liver cancer  
260 microenvironment was modeled using 2D and 3D mono- and co-culture systems. The  
261 transcriptome of five models was profiled to determine the effects of each condition. Each one  
262 of the culturing conditions mimicked an aspect of the TME. Based on our clustering methods,  
263 group 5 clustered away all the other groups, specifically group 1, in both the PCA plot and  
264 hierarchical cluster heatmap (Fig. 2 A-C). This is in line with the Venn diagram, where group 5  
265 had the highest number of unique genes that are not shared with other groups (Fig. 2D). This  
266 clear distinction suggests a fundamental difference in gene expression between the proposed  
267 model of group 5 and all other culturing conditions, signifying a considerable change in gene  
268 expression as a result of 3D co-culture of cancer spheroids with fibroblasts.

269

### 270 **Mimicking hypoxic conditions is not sufficient to mimic *in vivo* conditions**

271 Treatment with hypoxia mimicking agent significantly upregulated genes associated with p53  
272 and AP-1 networks (Table S1). AP-1 proteins (*i.e.* Jun, Fos, and ATF families) are activated by  
273 hypoxia and are frequently deregulated in cancer [41]. Deregulation of ATF-2 and its network  
274 have been implicated in liver development, regeneration, and cirrhosis [42]. In addition, ATF-2  
275 has been reported to play a role in HCC resistance to sorafenib, *in vivo* [43]. The presented  
276 hypoxia mimicking conditions also induced several metabolism pathways including fructose,  
277 mannose, starch, and sucrose metabolism; as well as glycolysis and gluconeogenesis (Fig. 3).  
278 Nonetheless, without treatment with CoCl<sub>2</sub>, HepG2 spheroids (group 4 & 5) upregulated genes  
279 were associated with HIF1- $\alpha$  and HIF2- $\alpha$  (Fig. 3A; Table S1). This is consistent with studies  
280 promoting cancer spheroids as candidate solid tumor model, as they recapitulate many aspects

281 of *in vivo* tumors including hypoxia [44]. Hypoxia-mediated pathways in turn promote survival,  
282 angiogenesis, invasion, and metastasis [45]. Hypoxia also plays a role in lipid and steroid  
283 metabolism [46]. Steroids promote tumor immune evasion by suppressing T cell activation and  
284 subsequently effecting immune-therapy outcome [47]. This is consistent with induction of  
285 steroid synthesis and estrogen signaling pathways in group 4 and 5 (physiological hypoxia), but  
286 not group 2 and 3, suggesting that chemically mimicking hypoxia is not sufficient to recapitulate  
287 a more encompassing hypoxic condition (Fig. 3; Table S1). Taken together, these results  
288 demonstrate how adjusting HepG2 cells from 2D to 3D culture introduces hypoxia and its  
289 associated hallmarks, which better represents *in vivo* cancer conditions.

290

### 291 **Reconstitution of the dynamic bilateral interaction between cancer and stromal cells through** 292 **3D co-culture system**

293 Studying the interaction between cancer cells, stromal fibroblasts, and their contribution to  
294 tumorigenesis remains a challenge. We, therefore, created a simplified system to mimic  
295 stroma-tumor interaction. HepG2 cells were either cultured with fibroblasts conditioned media  
296 only (group 3) to mimic one-way interaction or cultured with fibroblasts in a 3D-culture system  
297 (group 5) to mimic a two-way communication. When cultured with fibroblasts, HepG2  
298 upregulated genes were associated with integrin cell surface interactions, in addition to  
299 urokinase-type plasminogen activator (uPA) and uPAR-mediated signaling. Integrin signaling  
300 pathway (ISP) regulates the interaction with the extracellular environment in response to  
301 intracellular cues [48]  $\beta$ 1 integrins are overexpressed in many tumors, and blocking their  
302 signaling transduction reduces survival and tumorigenicity of many cancers, in 2D and 3D *in vitro*  
303 cultures, and *in vivo* [49–52]. ISP transduction has been reported to be promoted by other cell  
304 surface proteins, such as urokinase receptor (uPAR) [53]. Suppressing uPAR expression or  
305 disruption uPA/uPAR interaction have been reported to inhibit tumor progression and  
306 metastasis [54]. In addition, canonical pathways associated with the upregulated genes in  
307 group 3 and 5 included IL-6 mediated signaling. This is consistent with Integrin increased  
308 signaling, where enhanced IL-6/STAT3 signaling is promoted by  $\beta$ 1-Integrin pathway [55,56]. IL-  
309 6 overexpression has been reported in many cancers, including HCC, where it is suggested to

310 promote the transition of fibroblasts to CAFs [57]. Indeed, studies have shown CAFs as the main  
311 source of IL-6, promoting survival, migration, invasion, angiogenesis and stemness in colorectal,  
312 gastric, and liver cancer cells [58]. By co-culturing HepG2 cells with fibroblasts, we were able to  
313 recapitulate signaling pathways essential in tumor-stroma crosstalk, creating a more reliable  
314 model to study complex TME interactions.

315

### 316 **Recapitulating signaling pathways in HCC through 3D co-culture system**

317 Insulin/IGF signaling pathway is known to be activated in many cancers including HCC. Studies  
318 have shown its essential role in carcinogenesis and metastasis [59]. The insulin pathway was  
319 generally activated in 3D model (group 5) in comparison to other culturing methods. Many of  
320 the factors involved in insulin pathway – in addition to factors involved in hypoxia,  
321 angiogenesis, and MAPK signaling – were upregulated in our study (Fig. 3 & 4); which was  
322 confirmed on the transcriptome and secretome levels (Fig. 5). HK1 is dramatically upregulated  
323 in group 5 (Fig. 5a). HK1 shows involvement in glycolysis, HIF, and insulin signaling pathways  
324 (Fig. 3A-B), a role that has been reported in various studies; where HK1 contributes to  
325 glycolysis, proliferation, migration, and invasion of HCC [40,60,61]. Similarly, PFKFB3, a direct  
326 target of HIF1, is upregulated in all groups in comparison to group 1 and regulates glucose  
327 metabolism and promotes cancer progression and growth [62]. Overexpression of PFKFB3 is  
328 associated with poor prognosis of HCC, and its inhibition resulted in suppression of HCC growth  
329 *in vitro* and *in vivo* [63] and reversed the *in vitro* sorafenib-resistance of HCC cells [64]. EGLN3,  
330 that mediates crosstalk between hypoxia and insulin signaling pathways [65,66], was  
331 upregulated in HCC hypoxic settings [67,68]. Consistently, EGLN3 was a significant factor driving  
332 hypoxia and insulin pathways in our proposed model (group 5). Culturing HepG2 under 3D co-  
333 culture conditions also enhanced the expression of genes promoting angiogenesis, migration,  
334 and invasion such as SERPINE1, ETS1, MMP3, and MMP7. ETS1, MMP3, and MMP7 are only  
335 upregulated in group 5 in comparison to group 1. ETS1 is involved in upregulating hypoxia-  
336 target genes such as MMP3, and MMP7 [69,70]. Downregulation of ETS1 was reported to  
337 inhibit metastasis and invasion of liver cancer cell lines [71]. Similarly, Expression of MMP3 and  
338 MMP7 is correlated with enhanced metastatic phenotype, where their inhibition suppressed

339 invasion and migration of HCC cells [18]. SERPINE1 was distinctively upregulated in all groups  
340 compared to group 1, yet, with the highest fold change exhibited in group 5. Increased  
341 expression of PAI-1 (encoded by SERPINE1) is correlated with aggressive cancers and poor  
342 prognosis, where it is also associated with migration, invasion, and angiogenesis in HCC tissue  
343 [72]. Culturing HepG2 under 3D co-culture conditions also downregulated the expression of  
344 genes involved in cell cycle regulation and survival, including E2F2, E2F7, and E2F8. E2F  
345 transcription factors were only differentially expressed in group 5, where they were found to be  
346 downregulated in comparison to group 1, as confirmed by qPCR (Fig. 5a). Downregulation of  
347 E2F2, E2F7, and E2F8 prevents cell cycle arrest and enhances clonogenic survival [73]. Taken  
348 together, these findings indicate that culturing HepG2 in a 3D co-culture system (group 5)  
349 results in enhanced migration, invasion, metastasis, and angiogenesis, and successfully  
350 recapitulating many signaling pathways that are important in HCC *in vivo*.

351

#### 352 ***Pathway complementation analysis highlights the involvement of regulatory miRNAs***

353 The cross-talk between cancer cells and other cells in the TME is also partly mediated through  
354 expression of miRNA and/or release of miRNAs through extracellular vesicles (EVs) [74]. Gene-  
355 miRNA interaction network analysis of significant DEGs of group 5 revealed a number of  
356 predicted regulatory miRNAs (Fig. S4, full list in Table S2), many of which are signature of HCC  
357 deregulated miRNAs [39,60]. For instance, miR-335 had the highest number of connections in  
358 group 5 (Fig. S4 a). Serum of HCC patients undergoing TACE was analyzed for circulating miRNAs  
359 level, where miR-335 level was associated with significantly poor prognosis [75]. Thus, EV miR-  
360 335 has been suggested as a novel therapeutic strategy as it was shown to be involved in  
361 proliferation and invasion both *in vitro* and in animal model [76]. Our data suggest an  
362 interesting role of EV-based communication that could be explored in the future using our  
363 novel 3D co-culture HCC model, which resembles a simplified setting of the TME.

364

365 **Secretome profiling in our 3D co-culture supports genes expression profiling and**  
366 **recapitulates *in vivo* signatures**

367 Cellular communication between cancer cells and their surrounding is partially driven by  
368 secreted proteins and other soluble factors including cytokines, chemokines, and growth  
369 factors. Using antibody microarrays, we determined the levels of different factors and their  
370 binding proteins that play a role in insulin pathway, angiogenesis, and cytokine signaling (Fig. 5  
371 B-F). Our results show that secretion of insulin/ IGF pathway proteins IGF-2, IGFBP1, and  
372 IGFBP2 is increased by co-culturing HepG2 cells with fibroblasts under 3D co-culture conditions  
373 in comparison to mono-cultures (Fig. 5 B & G). IGF-2 is upregulated in several tumors including  
374 HCC. Its overexpression was notably detected in HCC patient and was shown to induce liver  
375 tumor formation, proliferation and angiogenesis in mice [36]. IGF binding proteins (IGFBPs) are  
376 essential in the IGF signaling axis, where they bind with high affinity to IGF-1 and IGF-2, and  
377 have been reported in HCC patients [59,77]. Granulocyte-, macrophage-, and granulocyte-  
378 macrophage- colony-stimulating factors (G-, M-, GM-, respectively) secreted levels have all  
379 increased in 3D co-culture setting in comparison to mono-cultures (Fig. 5 E & G). G-CSF, M-CSF,  
380 and GM-CSF have been shown to be involved in liver regeneration, fibrosis, angiogenesis, and  
381 initiation and progression of liver cancer [78]. Similarly, levels of factors involved in angiogenic  
382 pathway including growth factors, angiopoietins, and matrix metalloproteinases are increased  
383 by co-culturing HepG2 cells with fibroblasts under 3D culture conditions (Fig. 5 C & F-H).  
384 Despite that the 3D model we are proposing herein is restricted to cancer cells and fibroblasts,  
385 present data interestingly shows that our 3D model (group 5 settings) increase the secretion of  
386 several cytokines known to orchestrate the cross-talk between the tumor and its immune TME  
387 (Fig. 5 D & G-), triggering pro-tumor inflammation and immunosuppression [79]. Our pathway  
388 complementation analysis also highlighted two of the enriched genes of group 5 as prognostic  
389 markers, namely IGF1R and EGLN3 (Fig. 5 I-J). Both have been reported as indicators of poor HCC  
390 prognosis [68,80,81].

391

392 In conclusion, we propose a novel 3D tissue culture model of liver cancer that better mimics *in*  
393 *vivo* settings. Compared to the conventional 2D culture, the proposed model exhibits an  
394 increase in the expression of genes associated with development, progression, and poor  
395 prognosis of HCC. Our results showed that *in vivo* like conditions cannot be mimicked by simply

396 growing cancer cells as spheroids, but by co-culturing them with 3D fibroblast with which they  
397 were able to cross-talk. This was evident by the upregulation of several pathways involved in  
398 HCC, and the dramatic jump in secreted factors and surface receptors by co-cultured cancer  
399 cells, many of which are also involved in tumor-stroma interactions. We have explored the  
400 aspects of HCC our proposed model mimic by combining transcriptome and small scale-  
401 secretome analysis, which could be expanded in the future to include proteome analysis.  
402 Compared to the conventional 2D culture, the proposed model exhibits an increase in the  
403 expression of genes associated with development, progression, and poor prognosis of HCC. Our  
404 results correlated with a robust phenotype that better mirrors *in vivo* HCC, from gene  
405 expression to prognosis markers, and therefore, a more reliable platform for molecular  
406 understanding of HCC and possibly better anti-cancer drug screening platform.

407

408

409

#### 410 **Acknowledgements**

411 KCG is supported by a CONACYT scholarship (2019-000021-01EXTF-00542). RC is supported by SNF  
412 (CRSK-3\_190550), BBSRC (BB/N017773/2), and the UZH Research Priority Program (URPP) “Translational  
413 Cancer Research”. AA is supported by ZCHS (31R174), UPAR (31S319), and Terry Fox Foundation  
414 (21S103).

415

416

417

#### 418 **Competing financial interests**

419 The authors declare no competing interests.

## 420 References

- 421 [1] Quail DF, Joyce JA. Microenvironmental regulation of tumor progression and metastasis. *Nat*  
422 *Med* 2013;19:1423–37. <https://doi.org/10.1038/nm.3394>.
- 423 [2] Catalano V, Turdo A, Di Franco S, Dieli F, Todaro M, Stassi G. Tumor and its microenvironment: A  
424 synergistic interplay. *Semin Cancer Biol* 2013;23:522–32.  
425 <https://doi.org/10.1016/j.semcancer.2013.08.007>.
- 426 [3] Hanahan D, Weinberg RA. Hallmarks of cancer: The next generation. *Cell* 2011;144:646–74.  
427 <https://doi.org/10.1016/j.cell.2011.02.013>.
- 428 [4] Hanahan D, Coussens LM. Accessories to the Crime: Functions of Cells Recruited to the Tumor  
429 Microenvironment. *Cancer Cell* 2012;21:309–22. <https://doi.org/10.1016/j.ccr.2012.02.022>.
- 430 [5] Bissell MJ, Hines WC. Why don't we get more cancer? A proposed role of the microenvironment  
431 in restraining cancer progression. *Nat Med* 2011;17:320–9. <https://doi.org/10.1038/nm.2328>.
- 432 [6] Öhlund D, Elyada E, Tuveson D. Fibroblast heterogeneity in the cancer wound. *J Exp Med*  
433 2014;211:1503–23. <https://doi.org/10.1084/jem.20140692>.
- 434 [7] Orimo A, Gupta PB, Sgroi DC, Arenzana-Seisdedos F, Delaunay T, Naeem R, et al. Stromal  
435 fibroblasts present in invasive human breast carcinomas promote tumor growth and  
436 angiogenesis through elevated SDF-1/CXCL12 secretion. *Cell* 2005;121:335–48.  
437 <https://doi.org/10.1016/j.cell.2005.02.034>.
- 438 [8] Kalluri R, Zeisberg M. Fibroblasts in cancer. *Nat Rev Cancer* 2006;6:392–401.  
439 <https://doi.org/10.1038/nrc1877>.
- 440 [9] Cirri P, Chiarugi P. Cancer-associated-fibroblasts and tumour cells: A diabolic liaison driving  
441 cancer progression. *Cancer Metastasis Rev* 2012;31:195–208. [https://doi.org/10.1007/s10555-](https://doi.org/10.1007/s10555-011-9340-x)  
442 [011-9340-x](https://doi.org/10.1007/s10555-011-9340-x).
- 443 [10] Zhang J, Liu J. Tumor stroma as targets for cancer therapy. *Pharmacol Ther* 2013;137:200–15.  
444 <https://doi.org/10.1016/j.pharmthera.2012.10.003>.
- 445 [11] Chen X, Song E. Turning foes to friends: targeting cancer-associated fibroblasts. *Nat Rev Drug*  
446 *Discov* 2019;18:99–115. <https://doi.org/10.1038/s41573-018-0004-1>.
- 447 [12] Span PN, Bussink J. Biology of hypoxia. *Semin Nucl Med* 2015;45:101–9.  
448 <https://doi.org/10.1053/j.semnuclmed.2014.10.002>.
- 449 [13] Brahimi-Horn MC, Chiche J, Pouyssegur J. Hypoxia and cancer. *J Mol Med* 2007;85:1301–7.  
450 <https://doi.org/10.1007/s00109-007-0281-3>.
- 451 [14] Casazza A, Di Conza G, Wenes M, Finisguerra V, Deschoemaeker S, Mazzone M. Tumor stroma: A  
452 complexity dictated by the hypoxic tumor microenvironment. *Oncogene* 2014;33:1743–54.  
453 <https://doi.org/10.1038/onc.2013.121>.
- 454 [15] Gilkes DM, Semenza GL, Wirtz D. Hypoxia and the extracellular matrix: Drivers of tumour  
455 metastasis. *Nat Rev Cancer* 2014;14:430–9. <https://doi.org/10.1038/nrc3726>.
- 456 [16] Fitzmaurice C, Allen C, Barber RM, Barregard L, Bhutta ZA, Brenner H, et al. Global, regional, and  
457 national cancer incidence, mortality, years of life lost, years lived with disability, and disability-



- 458 adjusted life-years for 32 cancer groups, 1990 to 2015: A Systematic Analysis for the Global  
459 Burden of Disease Study Global Burden . JAMA Oncol 2017;3:524–48.  
460 <https://doi.org/10.1001/jamaoncol.2016.5688>.
- 461 [17] Ferlay J, Soerjomataram I, Ervik M, Dikshit R, Eser S, Mathers C, Rebelo M PD, Forman D, Bray F.  
462 GLOBOCAN 2012 v1.0, Cancer Incidence and Mortality Worldwide: IARC CancerBase. No. 11  
463 [Internet]. Lyon, Fr Int Agency Res Cancer 2013;11:<http://globocan.iarc.f>.
- 464 [18] Tu K, Dou C, Zheng X, Li C, Yang W, Yao Y, et al. Fibulin-5 inhibits hepatocellular carcinoma cell  
465 migration and invasion by down-regulating matrix metalloproteinase-7 expression. BMC Cancer  
466 2014;14:938. <https://doi.org/10.1186/1471-2407-14-938>.
- 467 [19] Fattovich G, Stroffolini T, Zagni I, Donato F. Hepatocellular carcinoma in cirrhosis: Incidence and  
468 risk factors. Gastroenterology, vol. 127, 2004. <https://doi.org/10.1053/j.gastro.2004.09.014>.
- 469 [20] Lin D, Wu J. Hypoxia inducible factor in hepatocellular carcinoma: A therapeutic target. World J  
470 Gastroenterol 2015;21:12171–8. <https://doi.org/10.3748/wjg.v21.i42.12171>.
- 471 [21] Zhang Q, Bai X, Chen W, Ma T, Hu Q, Liang C, et al. Wnt/ $\beta$ -catenin signaling enhances hypoxia-  
472 induced epithelial-mesenchymal transition in hepatocellular carcinoma via crosstalk with hif-1 $\alpha$   
473 signaling. Carcinogenesis 2013;34:962–73. <https://doi.org/10.1093/carcin/bgt027>.
- 474 [22] Wilson GK, Tennant DA, McKeating JA. Hypoxia inducible factors in liver disease and  
475 hepatocellular carcinoma: Current understanding and future directions. J Hepatol 2014;61:1397–  
476 406. <https://doi.org/10.1016/j.jhep.2014.08.025>.
- 477 [23] Anton D, Burckel H, Josset E, Noel G. Three-dimensional cell culture: A breakthrough in vivo. Int J  
478 Mol Sci 2015;16:5517–27. <https://doi.org/10.3390/ijms16035517>.
- 479 [24] Unger C, Kramer N, Walzl A, Scherzer M, Hengstschläger M, Dolznig H. Modeling human  
480 carcinomas: Physiologically relevant 3D models to improve anti-cancer drug development. Adv  
481 Drug Deliv Rev 2014;79:50–67. <https://doi.org/10.1016/j.addr.2014.10.015>.
- 482 [25] Ingram M, Techy GB, Saroufeem R, Yazan O, Narayan KS, Goodwin TJ, et al. Three-dimensional  
483 growth patterns of various human tumor cell lines in simulated microgravity of a NASA  
484 bioreactor. Vitro Cell Dev Biol - Anim 1997;33:459–66. [https://doi.org/10.1007/s11626-997-0064-](https://doi.org/10.1007/s11626-997-0064-8)  
485 8.
- 486 [26] Ravi M, Paramesh V, Kaviya SR, Anuradha E, Paul Solomon FD. 3D cell culture systems:  
487 Advantages and applications. J Cell Physiol 2015;230:16–26. <https://doi.org/10.1002/jcp.24683>.
- 488 [27] Mehta G, Hsiao AY, Ingram M, Luker GD, Takayama S. Opportunities and Challenges for use of  
489 Tumor Spheroids as Models to Test Drug Delivery and Efficacy. J Control Release 2012;164:192–  
490 204. <https://doi.org/10.1016/j.jconrel.2012.04.045>.
- 491 [28] Cervantes-Gracia K, Husi H. Integrative analysis of Multiple Sclerosis using a systems biology  
492 approach. Sci Rep 2018;8:1–14. <https://doi.org/10.1038/s41598-018-24032-8>.
- 493 [29] Bindea G, Mlecnik B, Hackl H, Charoentong P, Tosolini M, Kirilovsky A, et al. ClueGO: A Cytoscape  
494 plug-in to decipher functionally grouped gene ontology and pathway annotation networks.  
495 Bioinformatics 2009;25:1091–3. <https://doi.org/10.1093/bioinformatics/btp101>.
- 496 [30] Luo YD, Fang L, Yu HQ, Zhang J, Lin XT, Liu XY, et al. p53 haploinsufficiency and increased mTOR

- 497 signalling define a subset of aggressive hepatocellular carcinoma. *J Hepatol* 2021;74:96–108.  
498 <https://doi.org/10.1016/j.jhep.2020.07.036>.
- 499 [31] Petrelli A, Perra A, Cora D, Sulas P, Menegon S, Manca C, et al. MicroRNA/gene profiling unveils  
500 early molecular changes and nuclear factor erythroid related factor 2 (NRF2) activation in a rat  
501 model recapitulating human hepatocellular carcinoma (HCC). *Hepatology* 2014;59:228–41.  
502 <https://doi.org/10.1002/hep.26616>.
- 503 [32] Zhang C, Peng L, Zhang Y, Liu Z, Li W, Chen S, et al. The identification of key genes and pathways  
504 in hepatocellular carcinoma by bioinformatics analysis of high-throughput data. *Med Oncol*  
505 2017;34:101. <https://doi.org/10.1007/s12032-017-0963-9>.
- 506 [33] Ohnishi S, Murakami T, Moriyama T, Mitamura K, Imawari M. Androgen and estrogen receptors  
507 in hepatocellular carcinoma and in the surrounding noncancerous liver tissue. *Hepatology*  
508 1986;6:440–3. <https://doi.org/10.1002/hep.1840060320>.
- 509 [34] Battello N, Zimmer AD, Goebel C, Dong X, Behrmann I, Haan C, et al. The role of HIF-1 in  
510 oncostatin M-dependent metabolic reprogramming of hepatic cells. *Cancer Metab* 2016;4:3.  
511 <https://doi.org/10.1186/s40170-016-0141-0>.
- 512 [35] Liang H, Block TM, Wang M, Nefsky B, Long R, Hafner J, et al. Interleukin-6 and oncostatin M are  
513 elevated in liver disease in conjunction with candidate hepatocellular carcinoma biomarker GP73.  
514 *Cancer Biomarkers* 2012;11:161–71. <https://doi.org/10.3233/CBM-2012-00276>.
- 515 [36] Martinez-Quetglas I, Pinyol R, Dauch D, Torrecilla S, Tovar V, Moeini A, et al. IGF2 Is Up-regulated  
516 by Epigenetic Mechanisms in Hepatocellular Carcinomas and Is an Actionable Oncogene Product  
517 in Experimental Models. *Gastroenterology* 2016;151:1192–205.  
518 <https://doi.org/10.1053/j.gastro.2016.09.001>.
- 519 [37] Kutmon M, van Iersel MP, Bohler A, Kelder T, Nunes N, Pico AR, et al. PathVisio 3: An Extendable  
520 Pathway Analysis Toolbox. *PLoS Comput Biol* 2015;11.  
521 <https://doi.org/10.1371/journal.pcbi.1004085>.
- 522 [38] Yang X, Zhang Y, Hosaka K, Andersson P, Wang J, Tholander F, et al. VEGF-B promotes cancer  
523 metastasis through a VEGF-A-independent mechanism and serves as a marker of poor prognosis  
524 for cancer patients. *Proc Natl Acad Sci U S A* 2015;112:E2900–9.  
525 <https://doi.org/10.1073/pnas.1503500112>.
- 526 [39] Sulas P, Di Tommaso L, Novello C, Rizzo F, Rinaldi A, Weisz A, et al. A Large Set of miRNAs Is  
527 Dysregulated from the Earliest Steps of Human Hepatocellular Carcinoma Development. *Am J*  
528 *Pathol* 2018;188:785–94. <https://doi.org/10.1016/j.ajpath.2017.10.024>.
- 529 [40] Guo W, Qiu Z, Wang Z, Wang Q, Tan N, Chen T, et al. MiR-199a-5p is negatively associated with  
530 malignancies and regulates glycolysis and lactate production by targeting hexokinase 2 in liver  
531 cancer. *Hepatology* 2015;62:1132–44. <https://doi.org/10.1002/hep.27929>.
- 532 [41] Eferl R, Wagner EF. AP-1: a double-edged sword in tumorigenesis. *Nat Rev Cancer* 2003;3:859–  
533 68. <https://doi.org/10.1038/nrc1209>.
- 534 [42] Behnke M, Reimers M, Fisher R. The expression of embryonic liver development genes in  
535 hepatitis c induced cirrhosis and hepatocellular carcinoma. *Cancers (Basel)* 2012;4:945–68.  
536 <https://doi.org/10.3390/cancers4030945>.

- 537 [43] Rudalska R, Dauch D, Longerich T, McJunkin K, Wuestefeld T, Kang TW, et al. In vivo RNAi  
538 screening identifies a mechanism of sorafenib resistance in liver cancer. *Nat Med* 2014;20:1138–  
539 46. <https://doi.org/10.1038/nm.3679>.
- 540 [44] Kimlin LC, Casagrande G, Virador VM. In vitro three-dimensional (3D) models in cancer research:  
541 An update. *Mol Carcinog* 2013;52:167–82. <https://doi.org/10.1002/mc.21844>.
- 542 [45] Luo D, Wang Z, Wu J, Jiang C, Wu J. The role of hypoxia inducible factor-1 in hepatocellular  
543 carcinoma. *Biomed Res Int* 2014;2014. <https://doi.org/10.1155/2014/409272>.
- 544 [46] Shen G, Li X. The Multifaceted Role of Hypoxia-Inducible Factor 1 (HIF1) in Lipid Metabolism.  
545 *Hypoxia Hum. Dis., InTech*; 2017. <https://doi.org/10.5772/65340>.
- 546 [47] Mahata B, Pramanik J, van der Weyden L, Polanski K, Kar G, Riedel A, et al. Tumors induce de  
547 novo steroid biosynthesis in T cells to evade immunity. *Nat Commun* 2020;11:1–15.  
548 <https://doi.org/10.1038/s41467-020-17339-6>.
- 549 [48] Hynes RO. Integrins: Bidirectional, allosteric signaling machines. *Cell* 2002;110:673–87.  
550 [https://doi.org/10.1016/S0092-8674\(02\)00971-6](https://doi.org/10.1016/S0092-8674(02)00971-6).
- 551 [49] Park CC, Zhang H, Pallavicini M, Gray JW, Baehner F, Park CJ, et al.  $\beta$ 1 integrin inhibitory antibody  
552 induces apoptosis of breast cancer cells, inhibits growth, and distinguishes malignant from  
553 normal phenotype in three dimensional cultures and in vivo. *Cancer Res* 2006;66:1526–35.  
554 <https://doi.org/10.1158/0008-5472.CAN-05-3071>.
- 555 [50] White DE, Kurpios NA, Zuo D, Hassell JA, Blaess S, Mueller U, et al. Targeted disruption of  $\beta$ 1-  
556 integrin in a transgenic mouse model of human breast cancer reveals an essential role in  
557 mammary tumor induction. *Cancer Cell* 2004;6:159–70.  
558 <https://doi.org/10.1016/j.ccr.2004.06.025>.
- 559 [51] Schaffner F, Ray AM, Dontenwill M. Integrin  $\alpha$ 5 $\beta$ 1, the fibronectin receptor, as a pertinent  
560 therapeutic target in solid tumors. *Cancers (Basel)* 2013;5:27–47.  
561 <https://doi.org/10.3390/cancers5010027>.
- 562 [52] Grzesiak JJ, Bouvet M. Determination of the ligand-binding specificities of the  $\alpha$ 2 $\beta$ 1 and  
563  $\alpha$ 1 $\beta$ 1 integrins in a novel 3-dimensional in vitro model of pancreatic cancer. *Pancreas*  
564 2007;34:220–8. <https://doi.org/10.1097/01.mpa.0000250129.64650.f6>.
- 565 [53] Kugler MC, Wei Y, Chapman H a. Urokinase receptor and integrin interactions. *Curr Pharm Des*  
566 2003;9:1565–74. <https://doi.org/10.2174/1381612033454658>.
- 567 [54] Tyndall J, Kelso M, Clingan P, Ranson M. Peptides and Small Molecules Targeting the Plasminogen  
568 Activation System: Towards Prophylactic Anti-Metastasis Drugs for Breast Cancer. *Recent Pat*  
569 *Anticancer Drug Discov* 2008;3:1–13. <https://doi.org/10.2174/157489208783478711>.
- 570 [55] Shain KH, Yarde DN, Meads MB, Huang M, Jove R, Hazlehurst LA, et al.  $\beta$ 1 integrin adhesion  
571 enhances IL-6-mediated STAT3 signaling in myeloma cells: Implications for microenvironment  
572 influence on tumor survival and proliferation. *Cancer Res* 2009;69:1009–15.  
573 <https://doi.org/10.1158/0008-5472.CAN-08-2419>.
- 574 [56] Kesanakurti D, Chetty C, Dinh DH, Gujrati M, Rao JS. Role of MMP-2 in the regulation of IL-6/Stat3  
575 survival signaling via interaction with  $\alpha$ 5 $\beta$ 1 integrin in glioma. *Oncogene* 2013;32:327–40.  
576 <https://doi.org/10.1038/onc.2012.52>.

- 577 [57] Lee KW, Yeo SY, Sung CO, Kim SH. Twist1 is a key regulator of cancer-associated fibroblasts.  
578 *Cancer Res* 2015;75:73–85. <https://doi.org/10.1158/0008-5472.CAN-14-0350>.
- 579 [58] Lin ZY, Chuang YH, Chuang WL. Cancer-associated fibroblasts up-regulate CCL2, CCL26, IL6 and  
580 LOXL2 genes related to promotion of cancer progression in hepatocellular carcinoma cells.  
581 *Biomed Pharmacother* 2012;66:525–9. <https://doi.org/10.1016/j.biopha.2012.02.001>.
- 582 [59] Enguita-Germán M, Fortes P. Targeting the insulin-like growth factor pathway in hepatocellular  
583 carcinoma. *World J Hepatol* 2014;6:716–37. <https://doi.org/10.4254/wjh.v6.i10.716>.
- 584 [60] Pan JH, Zhou H, Zhao XX, Ding H, Li W, Qin L, et al. Role of exosomes and exosomal microRNAs in  
585 hepatocellular carcinoma: Potential in diagnosis and antitumour treatments (Review). *Int J Mol*  
586 *Med* 2018;41:1809–16. <https://doi.org/10.3892/ijmm.2018.3383>.
- 587 [61] Kim HR, Roe JS, Lee JE, Cho EJ, Youn HD. P53 regulates glucose metabolism by miR-34a. *Biochem*  
588 *Biophys Res Commun* 2013;437:225–31. <https://doi.org/10.1016/j.bbrc.2013.06.043>.
- 589 [62] Lu L, Chen Y, Zhu Y. The molecular basis of targeting PFKFB3 as a therapeutic strategy against  
590 cancer. *Oncotarget* 2017;8:62793–802. <https://doi.org/10.18632/oncotarget.19513>.
- 591 [63] Shi W-K, Zhu X-D, Wang C-H, Zhang Y-Y, Cai H, Li X-L, et al. PFKFB3 blockade inhibits  
592 hepatocellular carcinoma growth by impairing DNA repair through AKT. *Cell Death Dis*  
593 2018;9:428. <https://doi.org/10.1038/s41419-018-0435-y>.
- 594 [64] Li S, Dai W, Mo W, Li J, Feng J, Wu L, et al. By inhibiting PFKFB3, aspirin overcomes sorafenib  
595 resistance in hepatocellular carcinoma. *Int J Cancer* 2017;141:2571–84.  
596 <https://doi.org/10.1002/ijc.31022>.
- 597 [65] Taniguchi CM, Finger EC, Krieg AJ, Wu C, Diep AN, Lagory EL, et al. Cross-talk between hypoxia  
598 and insulin signaling through Phd3 regulates hepatic glucose and lipid metabolism and  
599 ameliorates diabetes. *Nat Med* 2013;19:1325–30. <https://doi.org/10.1038/nm.3294>.
- 600 [66] Yano H, Sakai M, Matsukawa T, Yagi T, Naganuma T, Mitsushima M, et al. PHD3 regulates glucose  
601 metabolism by suppressing stress-induced signalling and optimising gluconeogenesis and insulin  
602 signalling in hepatocytes. *Sci Rep* 2018;8:1–16. <https://doi.org/10.1038/s41598-018-32575-z>.
- 603 [67] Lu C, Fang S, Weng Q, Lv X, Meng M, Zhu J, et al. Integrated analysis reveals critical glycolytic  
604 regulators in hepatocellular carcinoma. *Cell Commun Signal* 2020;18.  
605 <https://doi.org/10.1186/s12964-020-00539-4>.
- 606 [68] Zhang Q, Qiao L, Liao J, Liu Q, Liu P, Liu L. A novel hypoxia gene signature indicates prognosis and  
607 immune microenvironments characters in patients with hepatocellular carcinoma. *J Cell Mol Med*  
608 2021;25:3772–84. <https://doi.org/10.1111/jcmm.16249>.
- 609 [69] Dittmer J. The biology of the Ets1 proto-oncogene. *Mol Cancer* 2003;2.  
610 <https://doi.org/10.1186/1476-4598-2-29>.
- 611 [70] Ozaki I, Mizuta T, Zhao G, Yotsumoto H, Hara T, Kajihara S, et al. Involvement of the Ets-1 gene in  
612 overexpression of matrilysin in human hepatocellular carcinoma. *Cancer Res* 2000;60:6519–25.
- 613 [71] Ma N, Chen F, Shen SL, Chen W, Chen LZ, Su Q, et al. MicroRNA-129-5p inhibits hepatocellular  
614 carcinoma cell metastasis and invasion via targeting ETS1. *Biochem Biophys Res Commun*  
615 2015;461:618–23. <https://doi.org/10.1016/j.bbrc.2015.04.075>.

- 616 [72] Placencio VR, DeClerck YA. Plasminogen activator inhibitor-1 in cancer: Rationale and insight for  
617 future therapeutic testing. *Cancer Res* 2015;75:2969–74. [https://doi.org/10.1158/0008-](https://doi.org/10.1158/0008-5472.CAN-15-0876)  
618 5472.CAN-15-0876.
- 619 [73] Mitxelena J, Apraiz A, Vallejo-rodr J, Garc I, Fullaondo A, Malumbres M, et al. An E2F7-dependent  
620 transcriptional program modulates DNA damage repair and genomic stability. *Nucleic Acids Res*  
621 2018;1–14. <https://doi.org/10.1093/nar/gky218>.
- 622 [74] Yim KHW, Hroust A Al, Borgoni S, Chahwan R. Extracellular vesicles orchestrate immune and  
623 tumor interaction networks. *Cancers (Basel)* 2020;12:1–23.  
624 <https://doi.org/10.3390/cancers12123696>.
- 625 [75] Cui L, Hu Y, Bai B, Zhang S. Serum miR-335 Level is Associated with the Treatment Response to  
626 Trans-Arterial Chemoembolization and Prognosis in Patients with Hepatocellular Carcinoma. *Cell*  
627 *Physiol Biochem* 2015;37:276–83. <https://doi.org/10.1159/000430352>.
- 628 [76] Wang F, Li L, Piontek K, Sakaguchi M, Selaru FM. Exosome miR-335 as a novel therapeutic  
629 strategy in hepatocellular carcinoma. *Hepatology* 2018;67:940–54.  
630 <https://doi.org/10.1002/hep.29586>.
- 631 [77] Wu J, Zhu AX. Targeting insulin-like growth factor axis in hepatocellular carcinoma. *J Hematol*  
632 *Oncol* 2011;4. <https://doi.org/10.1186/1756-8722-4-30>.
- 633 [78] Akazawa Y, Kono H, Hara M, Furuya S, Nakata Y, Wakana H, et al. M-CSF receptor antagonists  
634 inhibit the initiation and progression of hepatocellular carcinoma in mice. *Anticancer Res*  
635 2019;39:4787–94. <https://doi.org/10.21873/anticancer.13663>.
- 636 [79] Landskron G, De La Fuente M, Thuwajit P, Thuwajit C, Hermoso MA. Chronic inflammation and  
637 cytokines in the tumor microenvironment. *J Immunol Res* 2014;2014.  
638 <https://doi.org/10.1155/2014/149185>.
- 639 [80] Zhang Z, Lei B, Chai W, Liu R, Li T. Increased expression of insulin-like growth factor-1 receptor  
640 predicts poor prognosis in patients with hepatocellular carcinoma. *Medicine (Baltimore)*  
641 2019;98:e17680. <https://doi.org/10.1097/MD.00000000000017680>.
- 642 [81] Jiang L, Liu QL, Liang QL, Zhang HJ, Ou WT, Yuan G Le. Association of PHD3 and HIF2 $\alpha$  gene  
643 expression with clinicopathological characteristics in human hepatocellular carcinoma. *Oncol Lett*  
644 2018;15:545–51. <https://doi.org/10.3892/ol.2017.7302>.
- 645
- 646

647 **FIGURE LEGENDS**

648

649 **Figure 1. Experimental model and initial validations.** a) Schematic depiction of experimental groups. b)  
650 Bright field images of 2D/ 3D HepG2 and fibroblasts cultures fixed and stained with crystal violet and 3D  
651 fibroblasts fixed and stained with neutral red (scale bar = 50  $\mu\text{m}$ ). c) Cell viability of HepG2 cells after  
652 treatment with increasing concentrations of  $\text{CoCl}_2$  for 6 hours ( $p < 0.01$ ). d) HIF1- $\alpha$  protein expression  
653 was detected in  $\text{CoCl}_2$  HepG2-treated cells after 6 hours of incubation. Uncropped blots are shown in Fig.  
654 S1. e) Immunofluorescence detection of HIF1- $\alpha$  expression and localization in HepG2 cells incubated  
655 with or without  $\text{CoCl}_2$  (scale bar = 20  $\mu\text{m}$ ).

656

657 **Figure 2. Computational analysis of the RNA-Seq of our group cohorts.** a) Hierarchical clustering  
658 heatmap of global expression in all groups (in triplicates) was generated with Morpheus using default  
659 settings. B) PCA plot based on global expression in all groups (in triplicates) was generated using  
660 NetworkAnalyst c) PCA plot based on significant DEGs of group 2,3,4,5 in comparison to group 1. d)  
661 Venn diagrams showing the common and unique upregulated genes and downregulated genes of  
662 groups 2, 3, 4, and 5. The interactive diagrams can be accessed online using the InteractiVenn  
663 (<http://www.interactivenn.net>) and uploading supplementary files 1 & 2c)

664

665 **Figure 3. Pathway clustering analysis and heatmap representation of experimental groups.** a) Pathway  
666 term clustering based on KEGG pathway maps based on DEGs of experimental groups. All groups are  
667 compared to G1 as the control condition. Node size of pathway terms resemble the number of  
668 associated genes to it. The stronger the node color the more significant a cluster is. b) ORA heatmaps of  
669 enriched genes in denoted pathways based on KEGG from all groups. Heatmaps were generated using  
670 NetworkAnalyst.

671

672 **Figure 4. Customized Insulin signaling pathway map of Group 5 DEGs.** Insulin signaling pathway  
673 identified as significant through ClueGO/CluePedia pathway term clustering analyzed and customized  
674 through Pathvisio. Red boxes: up regulated genes; green boxes: down regulated genes; gray boxes:  
675 genes not found within the DEGs. Color intensity resembles the deregulated status of the gene from the  
676 LogFC scale (between a 1 to -1 LogFC ). A clear up-regulated trend was identified that resembles the  
677 activation of the pathway and the main genes involved within this mechanism. This customized pathway  
678 map delineates the line of significance from G5 Insulin signaling pathway. These results back-up and

679 *validate ClueGO/CluePedia analysis. Yellow and blue stars highlight the genes/proteins that were further*  
680 *validated either through antibody arrays or qPCR respectively.*

681  
682 **Figure 5. Confirmation studies using genomic, proteomic, and clinical analyses.** a) Validation by qPCR.  
683 RNA-Seq based expression was plotted against qPCR-based expression. qPCR data are represented as  
684 means of fold change  $\pm$  SD. b-f) levels of different secreted factors in 3D mono- and co-cultures analyzed  
685 by antibody arrays. Experimental scheme is outlined in Fig. S2 g) fold change of expression of HepG2 and  
686 Fibroblasts before and after co-culture for markers shown in panels b-f based on RNA-seq data. h)  
687 western blotting of total cell lysates of 2D or 3D HepG2 cultures. Uncropped blots are shown in Fig. S3. i-  
688 j) Kaplan–Meier curves of progression-free survival of IGF1R and EGLN3 in HCC patients.

689

690

691

692

#### 693 **SUPPLEMENTARY INFORMATION**

694

695 **Supplementary data:** materials and methods, and supplementary figures

696

697 **Table S1:** Canonical pathways list

698

699 **Table S2:** miRNA gene interaction list

700

701 **Supplementary document1:** Venn Dr file

702

703 **Supplementary document2:** Venn Ur file

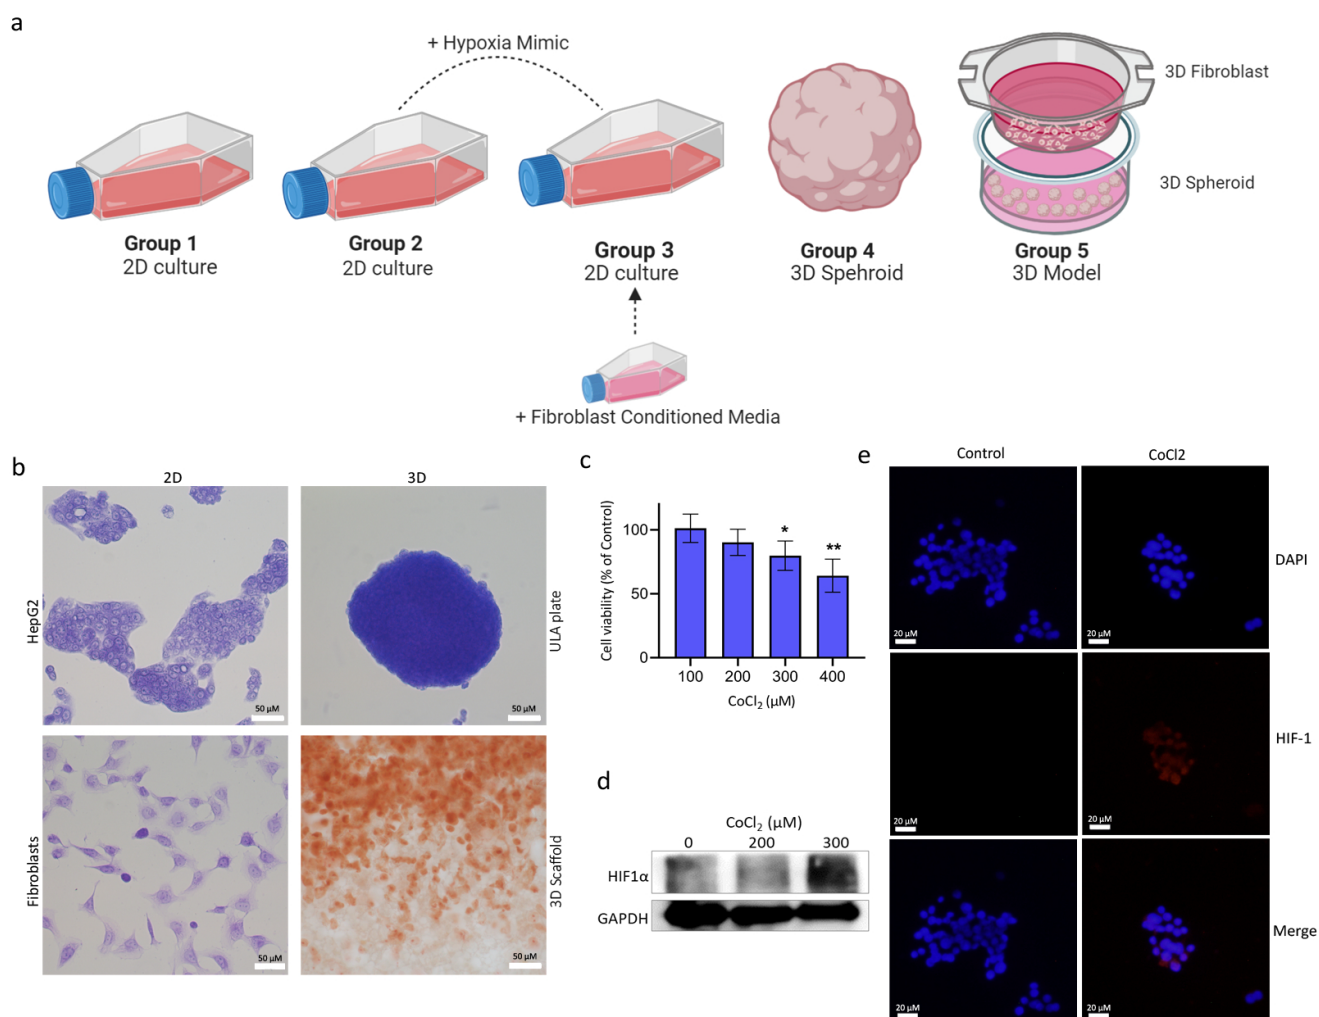



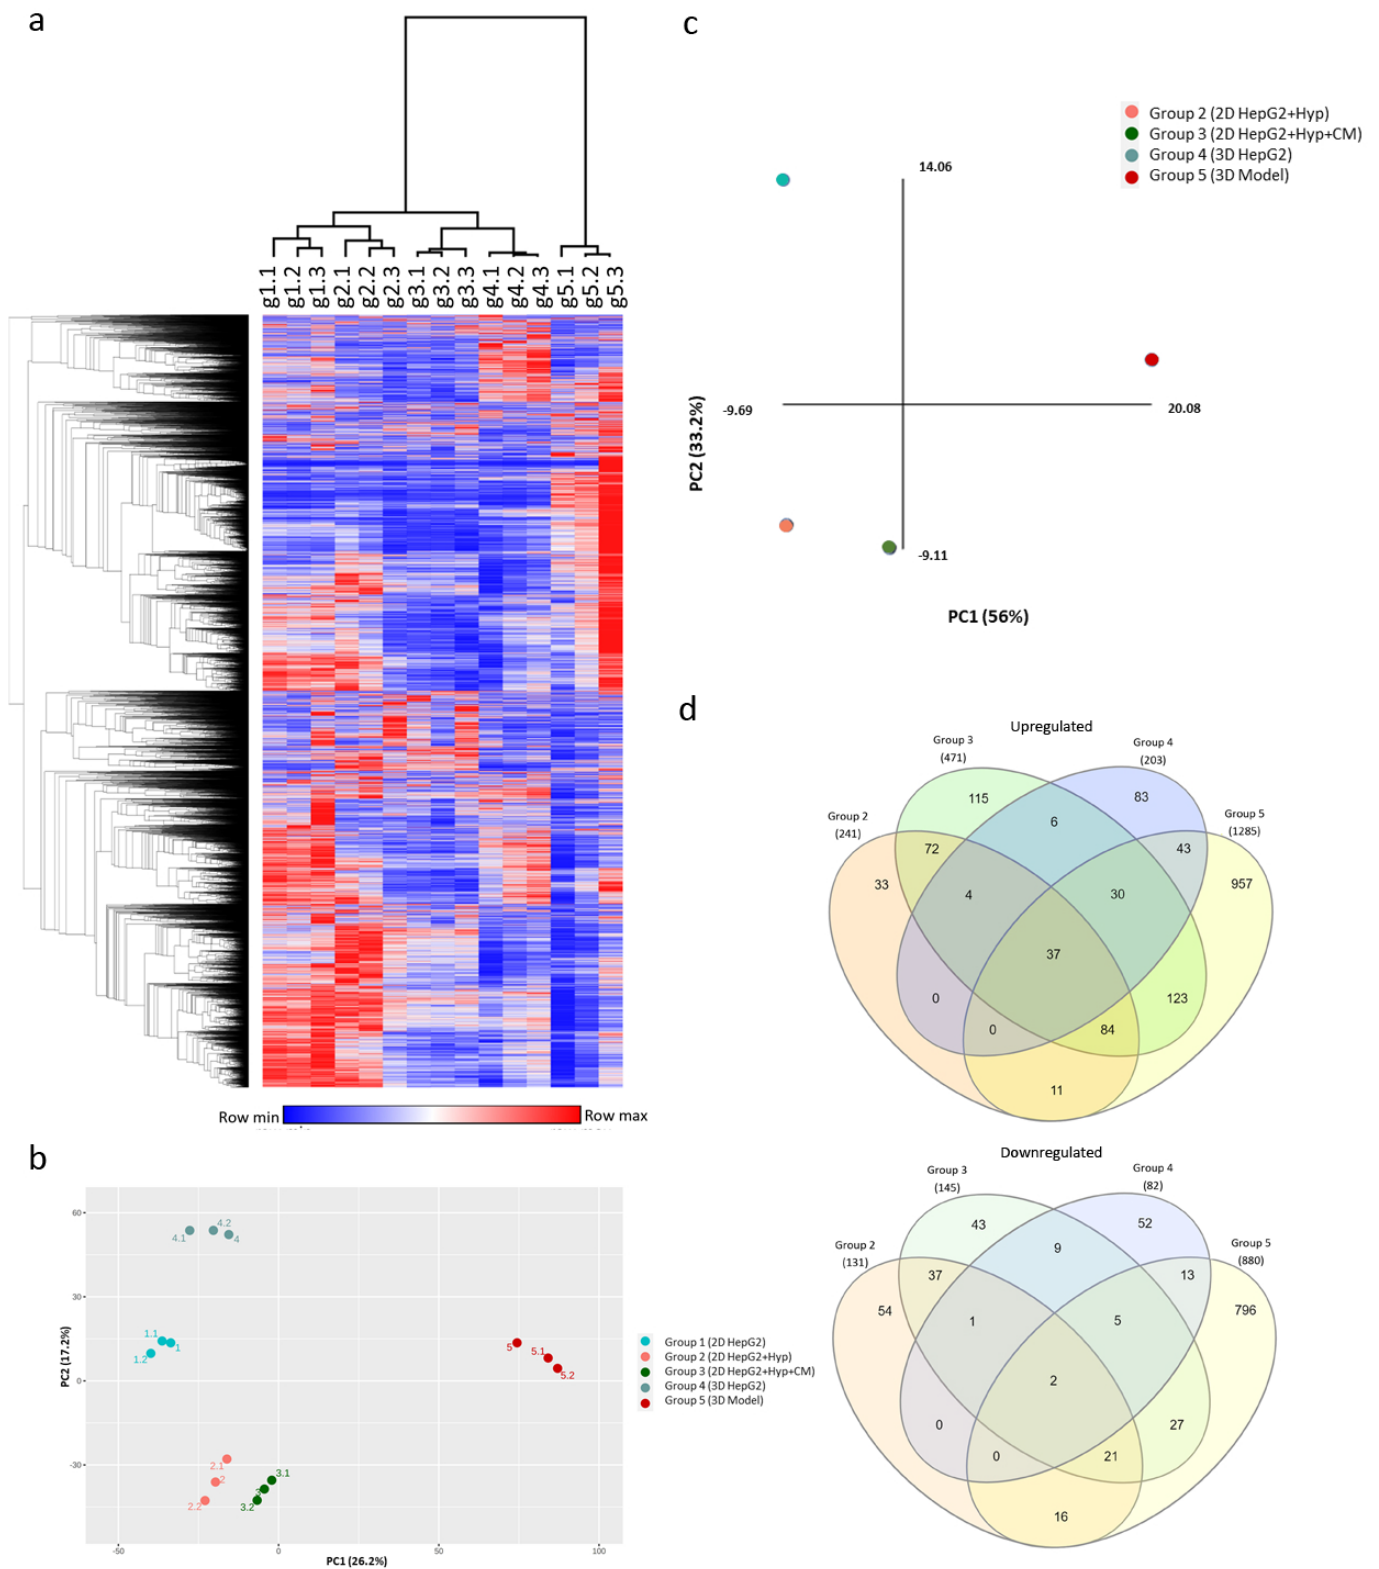

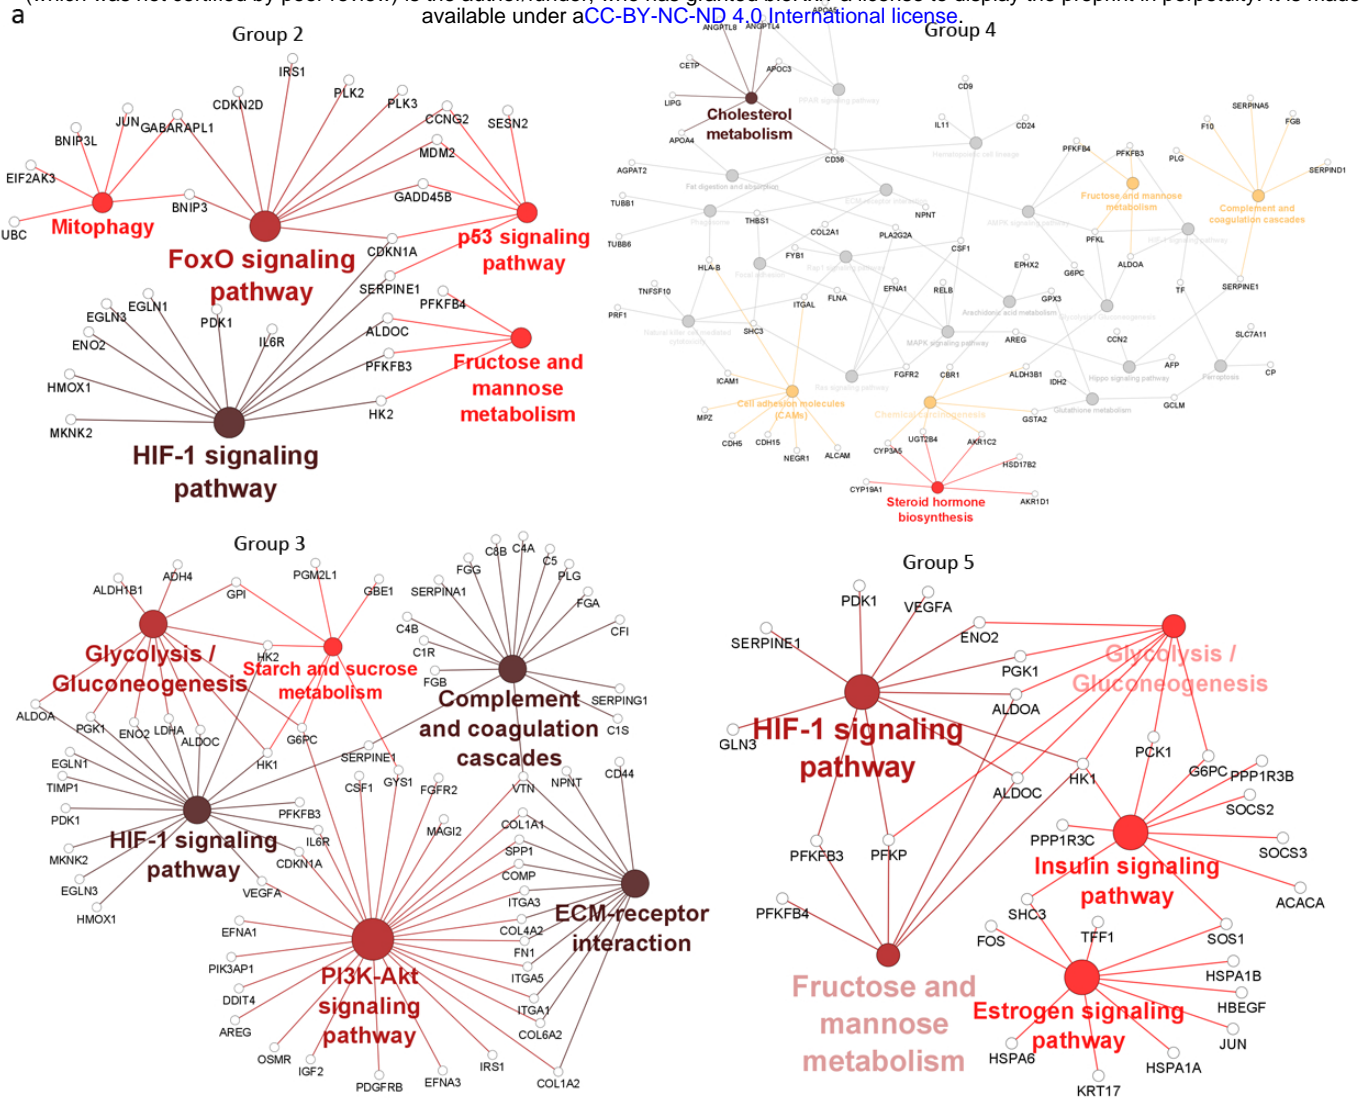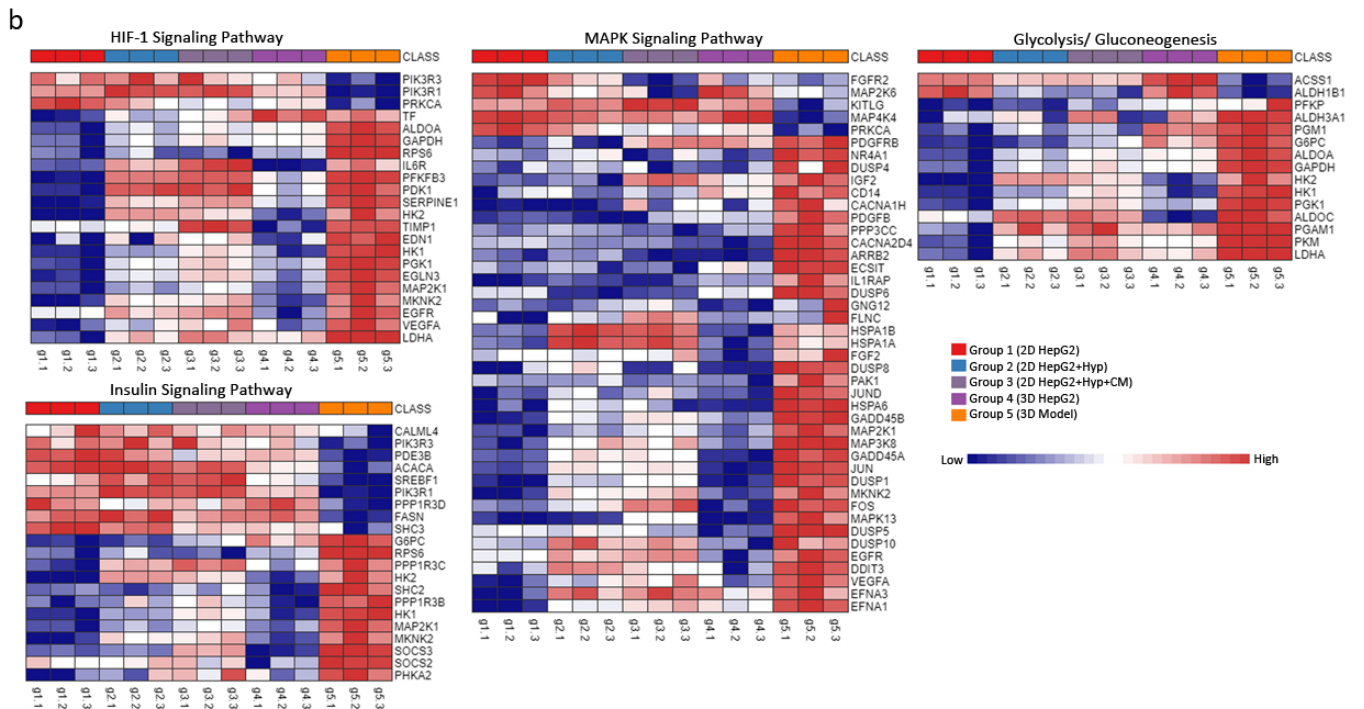

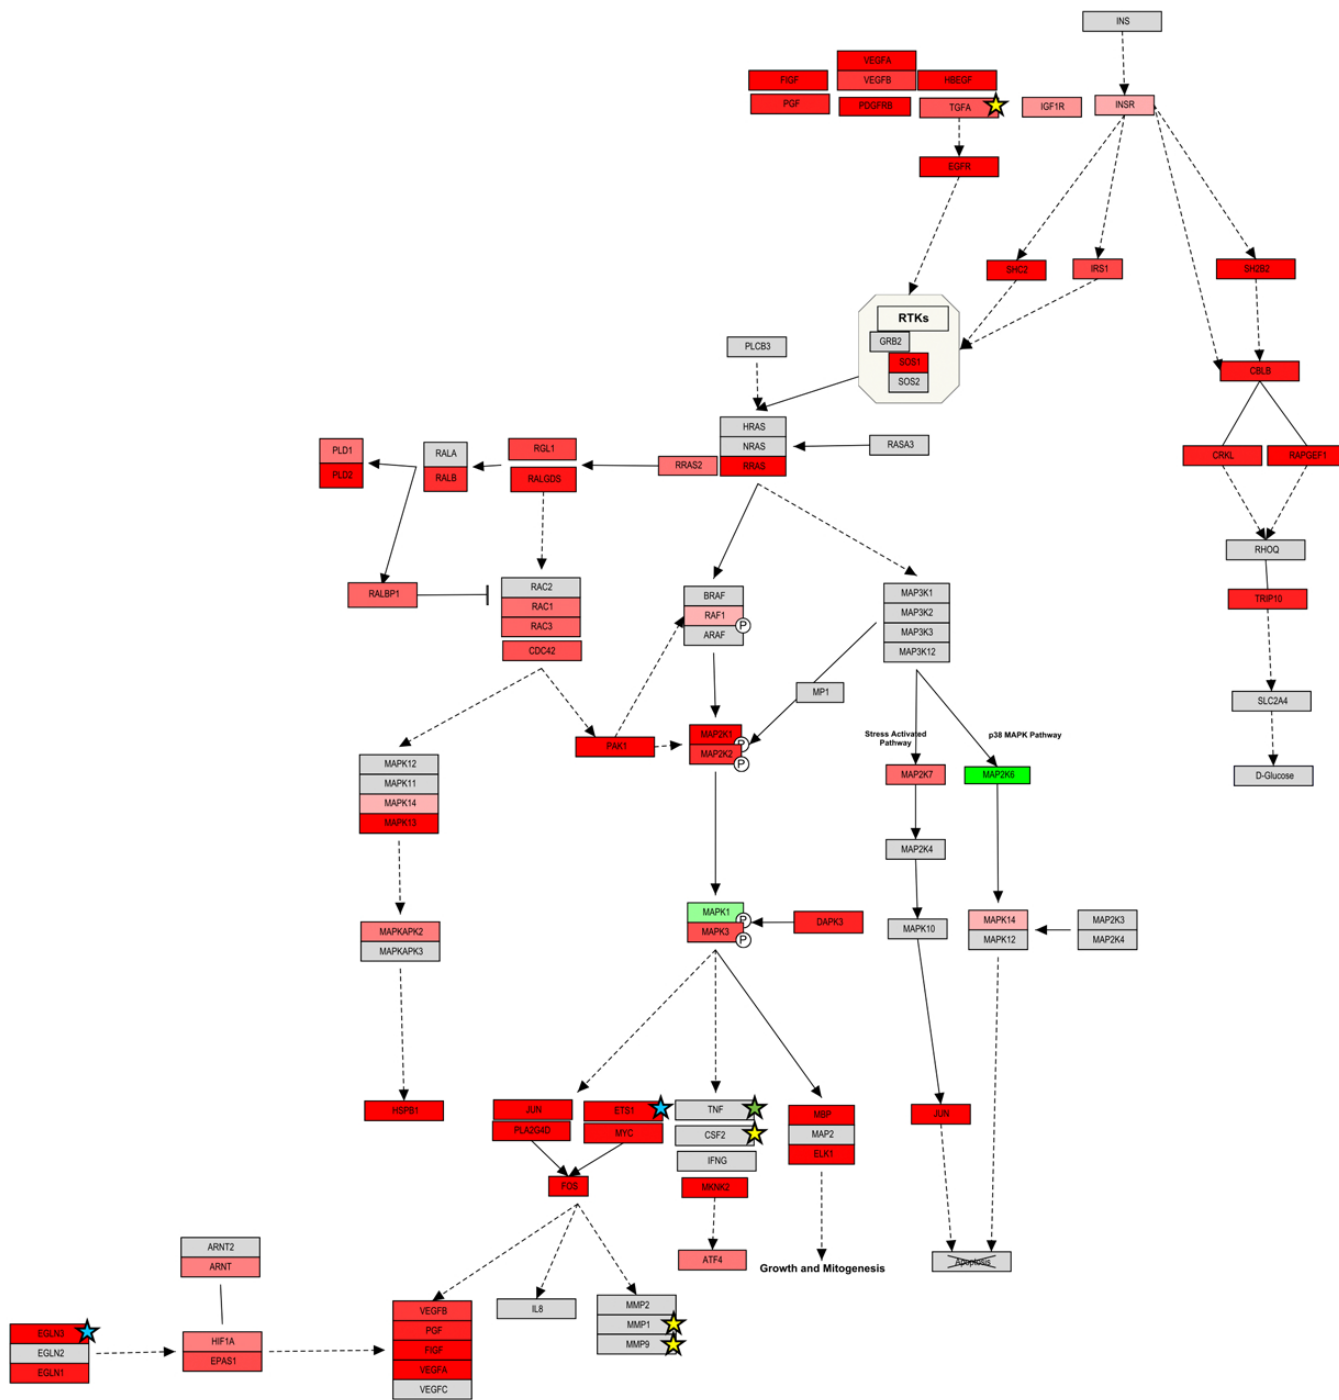

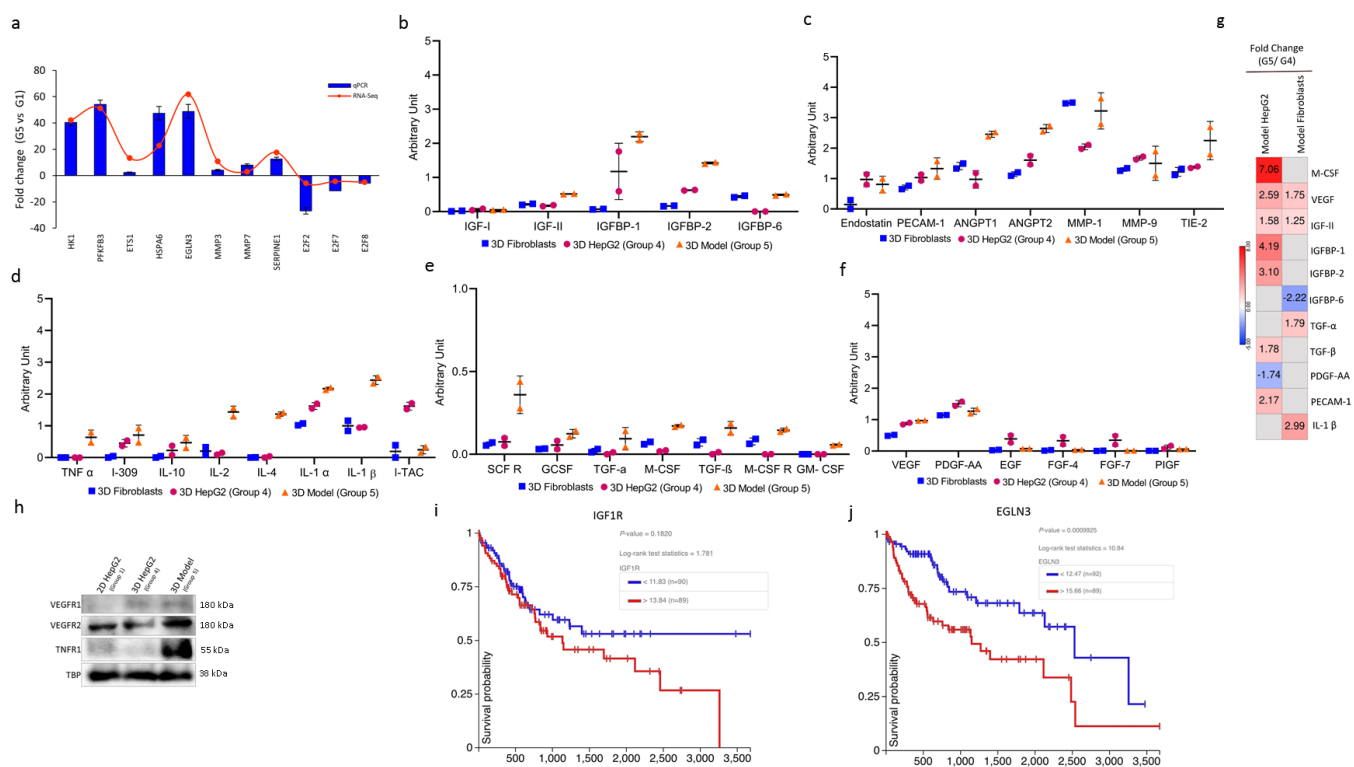

Source: https://www.biorxiv.org/content/biorxiv/early/2021/11/04/2021.11.04.467266.full.pdf
